# Supplementary material
Source: PubMed Central journal article supplement (PMC6976798)
Supplement: mmc1.pdf [file mmc1.pdf]

**Biophysical Journal, Volume 118**

**Supplemental Information**

**Rapid Simulation of Unprocessed DEER Decay Data for Protein Fold  
Prediction**

**Diego del Alamo, Maxx H. Tessmer, Richard A. Stein, Jimmy B. Feix, Hassane S.  
Mchaourab, and Jens Meiler**

Table S1. Benchmark set for evaluation of RosettaDEER.

| Protein   | Restrains | PDB      | Publication                          |
|-----------|-----------|----------|--------------------------------------|
| Bax       | 21        | 1F16 8   | Bleicken (2014) <i>Mol Cell</i> (40) |
| ExoU      | 11        | 3TU3     | Fischer (2017) <i>ACS Omega</i> (11) |
| CDB3      | 15        | 1HYN R/S | Zhou (2005) <i>Biochemistry</i> (41) |
| Rhodopsin | 14        | 1GZM A   | Altenbach (2008) <i>PNAS</i> (42)    |
| Mhp1      | 18        | 2JLN     | Kazmier (2014) <i>PNAS</i> (14)      |



| Pair                         | Experimental |          |                      | RosettaDEER |          | MDDS  |          | MMM       |          |             |          | TagDock |          | Pronox |          | MtsslWizard |          |
|------------------------------|--------------|----------|----------------------|-------------|----------|-------|----------|-----------|----------|-------------|----------|---------|----------|--------|----------|-------------|----------|
|                              | $\mu$        | $\sigma$ | C $\beta$ -C $\beta$ | $\mu$       | $\sigma$ | $\mu$ | $\sigma$ | (ambient) |          | (cryogenic) |          | $\mu$   | $\sigma$ | $\mu$  | $\sigma$ | $\mu$       | $\sigma$ |
|                              |              |          |                      |             |          |       |          | $\mu$     | $\sigma$ | $\mu$       | $\sigma$ |         |          |        |          |             |          |
| <b>CDB3 (PDB: 1HYN R/S)</b>  |              |          |                      |             |          |       |          |           |          |             |          |         |          |        |          |             |          |
| 105/105                      | 27.9         | 3.1      | 31.0                 | 30.4        | 3.8      | 21.7  | 3.6      | 25.5      | 3.2      | 29.6        | 2.8      | 32.7    | 3.1      | 32.1   | 1.7      | 30.9        | 2.1      |
| 116/116                      | 31.2         | 9.5      | 33.9                 | 36.4        | 4.7      | 31.4  | 3.4      | 32.5      | 4.4      | 32.2        | 4.6      | 30.2    | 2.7      | 26.8   | 2.7      | 31.9        | 1.7      |
| 142/142                      | 13.6         | 4.6      | 14.9                 | 15.7        | 3.2      | 14.5  | 3.9      | 23.4      | 2.7      | 20.4        | 3.2      | 11.0    | 2.1      | 22.4   | 4.5      | 15.7        | 5.4      |
| 199/199                      | 11.1         | 3.3      | 23.9                 | 22.5        | 5.5      | 22.0  | 4.0      | 22.4      | 4.3      | 23.7        | 3.8      | 24.5    | 2.5      | 20.8   | 3.8      | 23.5        | 1.2      |
| 208/208                      | 28.5         | 10.2     | 37.8                 | 34.1        | 5.8      | 34.4  | 4.5      | 37.3      | 4.1      | 32.6        | 2.9      | 44.5    | 0.9      | 33.8   | 2.8      | 38.3        | 2.7      |
| 277/277                      | 31.8         | 9.4      | 29.2                 | 32.5        | 1.8      | 30.7  | 3.9      | 27.1      | 3.9      | 36.2        | 3.3      | 22.0    | 3.1      | 35.0   | 0.7      | 30.1        | 1.8      |
| 290/290                      | 39.2         | 18.4     | 44.0                 | 46.5        | 4.7      | 37.5  | 4.0      | 38.9      | 4.6      | 40.3        | 4.1      | 36.1    | 1.1      | 43.5   | 5.2      | 44.2        | 4.0      |
| 312/312                      | 30.6         | 3.6      | 27.9                 | 32.6        | 4.4      | 36.0  | 3.8      | 35.3      | 3.5      | 37.4        | 3.2      | 31.2    | 2.7      | 27.5   | 1.2      | 29.0        | 2.7      |
| 340/340                      | 26.2         | 11.4     | 33.3                 | 38.4        | 4.7      | 40.3  | 4.5      | 21.5      | 1.5      | 19.8        | 0.8      | 26.3    | 2.2      | 22.1   | 1.6      | 33.9        | 6.0      |
| 342/342                      | 28.7         | 2.7      | 24.4                 | 25.8        | 3.6      | 21.5  | 4.7      | 25.2      | 3.6      | 26.4        | 2.5      | 20.1    | 5.1      | 30.6   | 2.8      | 24.1        | 2.1      |
| 343/343                      | 21.6         | 15.2     | 24.3                 | 30.6        | 5.3      | 30.8  | 3.4      | 29.9      | 3.2      | 31.9        | 1.7      | 25.9    | 3.8      | 30.9   | 2.9      | 23.9        | 1.9      |
| 344/344                      | 12.6         | 10.4     | 20.2                 | 21.1        | 3.7      | 25.4  | 3.7      | 23.2      | 1.8      | 23.8        | 2.5      | 30.1    | 0.9      | 18.6   | 2.7      | 21.9        | 1.3      |
| 345/345                      | 16.9         | 15.4     | 25.1                 | 32.1        | 5.0      | 31.4  | 2.1      | 31.3      | 3.7      | 32.4        | 2.0      | 23.6    | 3.5      | 34.9   | 2.2      | 26.7        | 2.2      |
| 84/84                        | 40.5         | 4.2      | 33.1                 | 40.7        | 4.9      | 43.1  | 3.1      | 39.4      | 4.4      | 38.5        | 3.4      | 42.0    | 0.9      | 40.5   | 2.8      | 35.7        | 1.8      |
| 96/96                        | 26.7         | 8.8      | 30.3                 | 36.6        | 3.9      | 37.7  | 3.7      | 38.9      | 3.5      | 36.9        | 3.7      | 33.8    | 5.0      | 35.6   | 4.6      | 31.4        | 2.9      |
| <b>Rhodopsin (PDB: 1GZM)</b> |              |          |                      |             |          |       |          |           |          |             |          |         |          |        |          |             |          |
| 63/241                       | 34.4         | 2.6      | 26.9                 | 40.6        | 2.6      | 39.0  | 3.4      | 37.8      | 4.0      | 38.8        | 2.5      | 36.4    | 2.2      | 42.4   | 3.2      | 31.0        | 2.3      |
| 63/252                       | 31.0         | 7.5      | 25.8                 | 36.3        | 2.2      | 35.3  | 3.0      | 33.1      | 3.4      | 33.9        | 2.2      | 31.6    | 2.2      | 35.7   | 2.5      | 26.0        | 1.8      |
| 63/326                       | 26.3         | 3.6      | 17.9                 | 26.3        | 2.4      | 24.2  | 3.5      | 22.4      | 2.0      | 22.7        | 1.8      | 24.2    | 2.6      | 29.2   | 2.7      | 18.5        | 1.4      |
| 74/137                       | 22.3         | 3.3      | 14.3                 | 21.1        | 0.8      | 19.7  | 4.0      | 22.9      | 2.5      | 23.1        | 1.4      | 19.5    | 1.5      | 21.0   | 0.6      | 16.6        | 2.2      |
| 74/225                       | 31.4         | 2.3      | 21.4                 | 33.7        | 1.6      | 30.5  | 3.8      | 33.0      | 2.5      | 34.1        | 2.4      | 31.3    | 1.9      | 36.0   | 0.7      | 24.1        | 1.7      |
| 74/252                       | 29.2         | 4.0      | 18.9                 | 31.0        | 1.5      | 30.8  | 2.5      | 30.9      | 1.6      | 29.4        | 1.2      | 29.6    | 1.0      | 32.0   | 1.5      | 20.9        | 1.0      |
| 74/308                       | 27.8         | 2.3      | 19.3                 | 28.6        | 1.9      | 29.6  | 2.5      | 30.1      | 1.4      | 28.9        | 1.3      | 26.5    | 1.8      | 29.5   | 1.6      | 20.4        | 0.9      |
| 137/326                      | 44.0         | 10.3     | 32.1                 | 37.7        | 2.2      | 37.1  | 3.4      | 35.9      | 1.5      | 36.0        | 1.0      | 34.7    | 1.0      | 35.8   | 4.9      | 32.9        | 2.3      |
| 151/241                      | 32.5         | 6.1      | 29.7                 | 37.0        | 3.2      | 38.4  | 3.0      | 37.2      | 3.3      | 35.5        | 3.0      | 33.5    | 2.5      | 37.5   | 3.5      | 28.0        | 2.9      |
| 151/308                      | 35.9         | 7.8      | 29.3                 | 37.3        | 2.4      | 39.6  | 2.8      | 38.8      | 2.3      | 36.7        | 2.1      | 35.3    | 2.8      | 38.5   | 2.6      | 28.8        | 1.7      |
| 151/326                      | 31.8         | 12.4     | 31.0                 | 35.1        | 4.0      | 36.0  | 3.9      | 30.0      | 3.5      | 31.1        | 3.6      | 34.2    | 4.2      | 37.5   | 3.7      | 31.2        | 2.2      |
| 225/252                      | 25.0         | 5.9      | 16.0                 | 21.8        | 3.2      | 24.2  | 3.1      | 20.5      | 3.9      | 21.1        | 4.0      | 24.5    | 3.2      | 25.2   | 3.4      | 18.1        | 1.3      |
| 225/308                      | 34.0         | 8.5      | 11.5                 | 35.2        | 2.9      | 36.5  | 3.0      | 36.5      | 2.4      | 34.0        | 1.8      | 32.9    | 4.1      | 36.6   | 2.7      | 27.7        | 1.4      |
| 252/326                      | 32.7         | 6.7      | 23.3                 | 26.1        | 2.5      | 25.4  | 4.3      | 28.2      | 3.4      | 26.0        | 3.4      | 21.2    | 4.7      | 23.9   | 4.7      | 23.9        | 1.8      |
| Correlation (r-squared)      |              |          | 0.27                 | 0.55        | 0.06     | 0.52  | 0.00     | 0.53      | 0.02     | 0.50        | 0.00     | 0.51    | 0.01     | 0.42   | 0.06     | 0.42        | 0.04     |

Table S3. List of spin-labeled proteins in the protein data bank.

| PDB      | Beta carbon |        |        | Nitroxide nitrogen |        |        | Nitroxide oxygen |        |        | Angle | Relative Distance |
|----------|-------------|--------|--------|--------------------|--------|--------|------------------|--------|--------|-------|-------------------|
|          | x           | y      | z      | x                  | y      | z      | x                | y      | z      |       |                   |
| 1ZYT (A) | 45.34       | -7.24  | 7.94   | 45.93              | -3.81  | 14.56  | 46.54            | -3.29  | 15.49  | 5.23  | 0.83              |
| 2CUU (A) | 31.74       | 9.11   | -11.29 | 37.09              | 11.32  | -15.90 | 38.33            | 11.54  | -16.04 | 7.24  | 0.84              |
| 2CUU (A) | 31.74       | 9.11   | -11.29 | 34.84              | 8.96   | -16.89 | 35.44            | 8.64   | -17.97 | 3.39  | 0.78              |
| 2IGC (A) | 0.63        | 23.03  | 97.36  | -1.83              | 18.50  | 98.24  | -2.70            | 18.07  | 98.95  | 11.49 | 0.81              |
| 2NTH (A) | -11.76      | 35.89  | 63.20  | -6.93              | 35.75  | 67.89  | -6.25            | 35.86  | 68.89  | 3.06  | 0.80              |
| 2OU8 (A) | 0.09        | 23.50  | 99.06  | -4.09              | 18.69  | 97.25  | -5.21            | 18.25  | 97.24  | 7.13  | 0.82              |
| 2OU8 (A) | 0.09        | 23.50  | 99.06  | 3.34               | 18.79  | 103.07 | 4.14             | 17.91  | 102.86 | 9.08  | 0.86              |
| 2OU9 (A) | 20.05       | 11.78  | 46.38  | 18.14              | 7.36   | 46.35  | 18.37            | 6.51   | 45.54  | 15.13 | 0.84              |
| 2Q9D (A) | 25.85       | 29.50  | 8.70   | 28.07              | 33.43  | 6.03   | 27.97            | 34.62  | 5.86   | 10.99 | 0.80              |
| 2Q9E (A) | 22.82       | 4.02   | 77.45  | 22.72              | 8.29   | 80.31  | 22.16            | 9.30   | 79.97  | 14.55 | 0.86              |
| 2Q9E (B) | 16.24       | -6.49  | 118.33 | 20.24              | -6.61  | 121.49 | 21.32            | -6.13  | 121.42 | 13.03 | 0.83              |
| 2Q9E (C) | -13.47      | -10.74 | 116.70 | -14.18             | -16.97 | 119.08 | -14.98           | -17.70 | 119.55 | 8.08  | 0.84              |
| 2XGA (A) | 27.64       | 36.01  | -12.25 | 33.29              | 35.15  | -9.09  | 34.17            | 35.48  | -8.27  | 6.37  | 0.80              |
| 2XGA (A) | 53.10       | 12.38  | 32.02  | 53.37              | 13.62  | 25.61  | 53.22            | 13.41  | 24.38  | 5.53  | 0.80              |
| 2XIU (A) | 30.89       | 11.72  | 13.12  | 32.52              | 18.09  | 14.29  | 32.68            | 19.22  | 13.87  | 7.07  | 0.82              |
| 2XIU (A) | 31.18       | 11.32  | 12.96  | 12.88              | 1.28   | 14.75  | 12.82            | 0.14   | 15.17  | 3.59  | 0.96              |
| 3G3V (A) | 32.01       | 9.42   | -11.26 | 37.17              | 11.36  | -16.07 | 38.43            | 11.38  | -16.25 | 7.83  | 0.84              |
| 3G3V (A) | 32.01       | 9.42   | -11.26 | 34.94              | 8.76   | -16.91 | 35.47            | 8.19   | -17.91 | 5.30  | 0.79              |
| 3M8B (A) | -36.14      | -15.28 | 3.58   | -34.89             | -19.33 | 7.52   | -34.61           | -20.63 | 7.42   | 12.64 | 0.82              |
| 3M8D (A) | 30.56       | -24.22 | -34.24 | 33.53              | -21.66 | -29.05 | 34.71            | -20.81 | -28.85 | 11.98 | 0.82              |
| 3MPN (A) | 46.41       | 34.94  | 18.10  | 47.66              | 35.80  | 25.63  | 47.41            | 35.92  | 27.00  | 4.61  | 0.80              |
| 3MPQ (A) | 29.69       | 31.87  | -0.63  | 29.42              | 28.90  | -4.58  | 29.24            | 27.53  | -4.75  | 15.33 | 0.79              |
| 3RGM (A) | 28.45       | -2.69  | -21.73 | 34.19              | 1.12   | -20.61 | 34.77            | 2.03   | -19.73 | 9.04  | 0.82              |
| 3RGN (A) | -34.31      | 44.87  | -34.41 | -31.48             | 49.85  | -38.26 | -31.67           | 51.20  | -38.45 | 10.25 | 0.83              |
| 3STZ (C) | 151.02      | 114.96 | -17.24 | 156.25             | 149.05 | -22.46 | 156.30           | 149.33 | -21.26 | 2.51  | 1.00              |
| 3STZ (C) | 155.90      | 146.71 | -29.68 | 156.25             | 149.05 | -22.46 | 156.30           | 149.33 | -21.26 | 1.10  | 0.81              |
| 3V3X (A) | 8.06        | 35.66  | 44.62  | 7.17               | 40.73  | 39.31  | 6.94             | 41.37  | 38.29  | 2.62  | 0.81              |
| 3V3X (B) | 20.59       | 27.24  | 17.69  | 13.12              | 27.74  | 16.14  | 12.09            | 27.49  | 15.56  | 4.78  | 0.83              |
| 3V3X (B) | 20.43       | 27.14  | 17.71  | 14.29              | 28.00  | 16.08  | 13.28            | 27.42  | 15.67  | 8.53  | 0.82              |
| 3V3X (B) | 20.826      | 30.531 | -11.28 | 26.72              | 40.34  | 48.40  | 27.59            | 40.28  | 47.56  | 1.13  | 1.02              |
| 3V3X (C) | 5.82        | 27.48  | 36.57  | 9.99               | 23.00  | 39.69  | 10.62            | 22.08  | 40.20  | 2.00  | 0.80              |
| 3V3X (D) | 22.506      | 23.768 | 6.859  | 27.85              | 21.68  | 8.62   | 28.91            | 21.03  | 8.59   | 5.65  | 0.78              |
| 3V3X (D) | 22.401      | 24.15  | 6.799  | 28.74              | 23.01  | 9.39   | 29.87            | 22.71  | 9.77   | 1.39  | 0.80              |
| 3V3X (D) | 28.74       | 38.19  | 32.17  | 31.88              | 41.91  | 26.95  | 32.61            | 42.58  | 26.22  | 2.71  | 0.81              |
| 4EK1 (A) | 28.41       | -27.82 | 0.47   | 29.53              | -29.48 | 7.15   | 29.96            | -30.24 | 8.29   | 5.64  | 0.78              |
| 4EK1 (B) | 17.67       | -27.74 | 35.80  | 19.44              | -29.86 | 41.92  | 19.43            | -30.90 | 42.84  | 8.46  | 0.80              |
| 5BMG (A) | 68.09       | 8.92   | 26.62  | 69.95              | 14.65  | 20.03  | 69.36            | 15.35  | 21.21  | 10.97 | 1.08              |
| 5BMG (B) | 70.46       | 8.41   | 30.86  | 68.76              | 14.18  | 32.79  | 68.81            | 15.31  | 33.24  | 4.57  | 0.79              |
| 5BMG (B) | 70.46       | 8.41   | 30.86  | 74.05              | 10.31  | 26.90  | 74.00            | 9.10   | 27.04  | 13.52 | 1.13              |
| 5BMG (D) | 64.35       | -31.08 | 48.92  | 66.58              | -25.65 | 51.29  | 67.33            | -24.68 | 51.37  | 5.89  | 0.80              |
| 5BMG (E) | 61.98       | 23.34  | 48.91  | 61.65              | -28.81 | 44.96  | 62.20            | -29.35 | 44.01  | 1.45  | 0.99              |
| 5BMG (F) | 59.71       | -22.93 | 53.48  | 62.05              | -28.84 | 56.84  | 61.78            | -29.62 | 57.73  | 7.70  | 0.84              |
| 5BMG (G) | 67.80       | 17.05  | 26.41  | 63.62              | 11.03  | 27.98  | 63.33            | 10.00  | 27.39  | 8.47  | 0.87              |
| 5BMH (A) | 0.05        | -10.04 | -13.40 | -1.59              | -8.86  | -18.40 | -1.45            | -8.90  | -19.62 | 8.29  | 0.77              |
| 5BMH (A) | 0.21        | -10.02 | -13.65 | -1.66              | -8.67  | -18.34 | -1.55            | -8.70  | -19.56 | 9.38  | 0.77              |
| 5BMI (A) | -12.45      | 12.28  | -1.86  | -7.06              | 15.58  | -4.29  | -6.04            | 15.52  | -4.96  | 7.42  | 0.83              |
| 5I26 (A) | 94.17       | 13.89  | 136.21 | 97.47              | 15.70  | 141.52 | 97.75            | 16.31  | 142.46 | 4.80  | 0.81              |
| 5I26 (B) | 121.29      | 25.02  | 121.83 | 121.69             | 18.58  | 121.08 | 122.34           | 17.62  | 121.18 | 0.55  | 0.99              |
| 5I26 (C) | 90.81       | 62.80  | 115.49 | 85.28              | 65.25  | 117.86 | 84.85            | 65.22  | 118.94 | 0.92  | 1.01              |
| 5I26 (D) | 75.61       | 38.89  | 96.79  | 78.64              | 41.52  | 91.87  | 78.33            | 42.28  | 91.05  | 0.89  | 1.00              |
| 5I28 (A) | 253.06      | 53.98  | 41.53  | 256.95             | 56.60  | 46.87  | 257.07           | 57.16  | 47.86  | 0.50  | 1.00              |
| 5I28 (B) | 241.07      | 51.61  | 72.62  | 237.23             | 53.97  | 67.15  | 237.07           | 54.42  | 66.10  | 0.71  | 1.00              |
| 5I28 (C) | 254.91      | 59.75  | 42.24  | 248.27             | 57.34  | 42.90  | 247.35           | 56.89  | 43.43  | 0.32  | 1.01              |
| 5I28 (D) | 261.00      | 7.94   | 25.94  | 260.59             | 4.56   | 22.84  | 259.61           | 4.31   | 22.27  | 0.25  | 1.01              |
| 5I28 (E) | 242.01      | 18.87  | 3.05   | 238.04             | 15.54  | -1.77  | 237.84           | 14.60  | -2.40  | 4.49  | 0.96              |
| 5I28 (F) | 290.39      | 18.69  | 26.81  | 285.83             | 18.41  | 20.66  | 285.50           | 18.81  | 19.63  | 1.81  | 1.01              |
| 5I28 (G) | 223.92      | 68.30  | 42.05  | 222.89             | 64.06  | 47.69  | 222.43           | 63.01  | 47.87  | 2.15  | 0.98              |
| 5I28 (H) | 268.83      | 69.81  | 68.41  | 271.91             | 65.90  | 65.16  | 272.94           | 65.38  | 65.17  | 2.10  | 0.89              |
| 5I28 (I) | 270.04      | 41.64  | 65.86  | 269.40             | 45.76  | 70.37  | 269.61           | 46.73  | 70.97  | 5.44  | 0.80              |
| 5I28 (J) | 222.99      | 43.38  | 41.56  | 219.19             | 47.62  | 46.17  | 219.27           | 48.46  | 46.97  | 6.80  | 0.85              |
| 5JDT (A) | 34.90       | -28.61 | -16.81 | 32.74              | -24.46 | -11.81 | 32.18            | -23.58 | -11.01 | 2.52  | 0.78              |
| 5JDT (A) | 35.02       | -28.35 | -16.57 | 32.87              | -24.65 | -11.87 | 32.37            | -23.92 | -10.88 | 0.85  | 0.76              |

Table S4. Experimental DEER decay parameters obtained using DeerAnalysis (continued on following page).

| Res 1                    | Res 2 | k     | $\lambda$ | Duration     |         |
|--------------------------|-------|-------|-----------|--------------|---------|
|                          |       |       |           | Oscillations | $\mu$ s |
| <b>Bax (PDB: 1F16 H)</b> |       |       |           |              |         |
| 16                       | 62    | -0.01 | 0.389     | 4.45         | 3.00    |
| 55                       | 87    | -0.01 | 0.348     | 2.64         | 3.70    |
| 55                       | 101   | 0.00  | 0.342     | 3.59         | 3.20    |
| 55                       | 126   | 0.00  | 0.337     | 2.99         | 3.10    |
| 55                       | 149   | -0.01 | 0.286     | 4.85         | 2.70    |
| 62                       | 87    | -0.01 | 0.389     | 2.71         | 3.50    |
| 62                       | 101   | 0.00  | 0.397     | 3.54         | 2.70    |
| 62                       | 126   | -0.27 | 0.55      | 7.66         | 4.62    |
| 62                       | 149   | -0.01 | 0.442     | 4.49         | 2.70    |
| 62                       | 169   | -0.01 | 0.286     | 12.73        | 2.40    |
| 72                       | 87    | -0.01 | 0.388     | 3.93         | 3.20    |
| 72                       | 101   | -0.01 | 0.304     | 4.77         | 3.30    |
| 72                       | 126   | 0.00  | 0.237     | 8.62         | 2.50    |
| 72                       | 169   | -0.01 | 0.382     | 7.55         | 3.00    |
| 87                       | 126   | -0.01 | 0.234     | 4.33         | 2.00    |
| 101                      | 126   | 0.00  | 0.195     | 2.26         | 1.70    |
| 101                      | 149   | -0.01 | 0.206     | 3.18         | 1.50    |
| 101                      | 169   | -0.01 | 0.319     | 5.23         | 1.80    |
| 126                      | 169   | 0.00  | 0.356     | 2.47         | 3.00    |
| 72                       | 186   | -0.01 | 0.135     | 3.38         | 1.70    |
| 87                       | 186   | -0.01 | 0.175     | 4.48         | 1.70    |
| <b>Mhp1 (PDB: 2JLN)</b>  |       |       |           |              |         |
| 30                       | 163   | -0.05 | 0.115     | 4.47         | 2.95    |
| 30                       | 243   | -0.08 | 0.127     | 6.32         | 2.05    |
| 30                       | 338   | 0.00  | 0.125     | 1.16         | 2.14    |
| 51                       | 278   | -0.05 | 0.171     | 6.48         | 1.74    |
| 63                       | 285   | -0.05 | 0.072     | 3.66         | 2.94    |
| 63                       | 362   | -0.04 | 0.076     | 3.82         | 2.54    |
| 136                      | 278   | -0.04 | 0.099     | 6.42         | 2.44    |
| 136                      | 349   | -0.04 | 0.064     | 4.10         | 2.94    |
| 144                      | 278   | -0.03 | 0.13      | 3.72         | 2.74    |
| 159                      | 324   | -0.12 | 0.218     | 7.72         | 2.05    |
| 163                      | 243   | -0.02 | 0.1       | 1.74         | 3.24    |
| 184                      | 278   | -0.07 | 0.163     | 6.22         | 2.34    |
| 234                      | 338   | -0.03 | 0.064     | 1.78         | 2.65    |
| 243                      | 338   | -0.03 | 0.252     | 0.89         | 3.45    |
| 278                      | 349   | -0.05 | 0.052     | 3.13         | 2.94    |
| 278                      | 362   | -0.04 | 0.143     | 3.65         | 2.74    |
| 285                      | 349   | -0.02 | 0.057     | 3.93         | 2.74    |
| 349                      | 362   | -0.04 | 0.117     | 4.62         | 2.74    |
| <b>ExoU (PDB: 3TU3)</b>  |       |       |           |              |         |
| 592                      | 636   | -0.05 | 0.127     | 7.07         | 2.62    |
| 592                      | 649   | -0.01 | 0.081     | 10.05        | 2.91    |
| 598                      | 680   | -0.05 | 0.096     | 7.12         | 2.93    |
| 629                      | 645   | -0.01 | 0.088     | 6.66         | 2.02    |
| 636                      | 645   | -0.02 | 0.117     | 11.10        | 2.72    |
| 636                      | 649   | -0.06 | 0.123     | 12.74        | 2.62    |
| 636                      | 657   | -0.03 | 0.115     | 10.57        | 2.62    |
| 636                      | 672   | -0.06 | 0.149     | 5.36         | 2.62    |
| 636                      | 677   | -0.03 | 0.18      | 5.85         | 2.43    |
| 636                      | 682   | -0.03 | 0.164     | 8.71         | 2.74    |
| 649                      | 672   | -0.04 | 0.2       | 6.53         | 2.34    |

| Res 1                          | Res 2 | k     | $\lambda$ | Duration     |               |
|--------------------------------|-------|-------|-----------|--------------|---------------|
|                                |       |       |           | Oscillations | $\mu\text{s}$ |
| <b>CDB3 (PDB: 1HYN R/S)</b>    |       |       |           |              |               |
| 84                             | 84    | -0.06 | 0.185     | 2.65         | 1.59          |
| 96                             | 96    | -0.07 | 0.177     | 2.72         | 1.59          |
| 105                            | 105   | -0.05 | 0.122     | 16.35        | 0.78          |
| 116                            | 116   | -0.05 | 0.108     | 29.81        | 0.78          |
| 142                            | 142   | -0.03 | 0.071     | 3.58         | 1.59          |
| 199                            | 199   | -0.10 | 0.146     | 3.86         | 2.38          |
| 208                            | 208   | -0.06 | 0.062     | 2.58         | 2.98          |
| 277                            | 277   | -0.03 | 0.19      | 3.60         | 1.99          |
| 290                            | 290   | -0.08 | 0.195     | 12.88        | 4.46          |
| 312                            | 312   | -0.03 | 0.078     | 4.36         | 1.99          |
| 340                            | 340   | -0.04 | 0.243     | 12.81        | 2.47          |
| 342                            | 342   | -0.06 | 0.163     | 40.76        | 1.57          |
| 343                            | 343   | -0.08 | 0.17      | 17.06        | 1.59          |
| 344                            | 344   | -0.07 | 0.162     | 2.37         | 3.02          |
| 345                            | 345   | -0.04 | 0.228     | 8.13         | 2.98          |
| <b>Rhodopsin (PDB: 1GZM A)</b> |       |       |           |              |               |
| 63                             | 241   | -0.36 | 0.326     | 3.26         | 2.56          |
| 63                             | 252   | -0.05 | 0.233     | 3.42         | 1.97          |
| 63                             | 326   | -0.09 | 0.101     | 4.17         | 1.46          |
| 74                             | 137   | -0.16 | 0.218     | 8.29         | 1.77          |
| 74                             | 225   | -0.13 | 0.234     | 2.96         | 1.77          |
| 74                             | 252   | -0.10 | 0.214     | 3.70         | 1.77          |
| 74                             | 308   | -0.14 | 0.413     | 4.77         | 1.98          |
| 137                            | 326   | 0.02  | 0.25      | 1.55         | 2.54          |
| 151                            | 241   | -0.18 | 0.085     | 3.84         | 2.54          |
| 151                            | 308   | -0.03 | 0.133     | 2.21         | 1.97          |
| 151                            | 326   | -0.05 | 0.146     | 4.01         | 2.47          |
| 225                            | 252   | -0.35 | 0.277     | 3.90         | 1.17          |
| 225                            | 308   | -0.25 | 0.292     | 3.28         | 2.47          |
| 252                            | 326   | -0.04 | 0.282     | 2.92         | 1.97          |

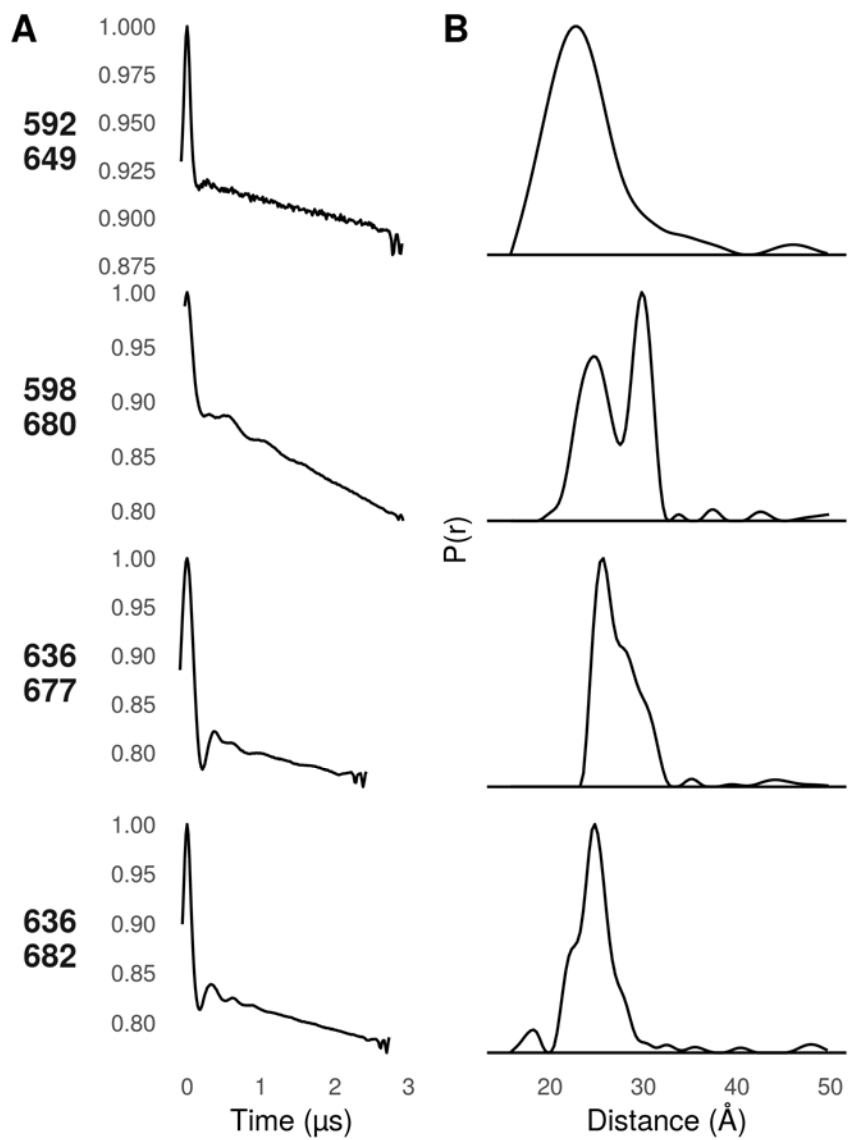

Figure S1 . Data gathered in the ExoU C-terminus for this study.



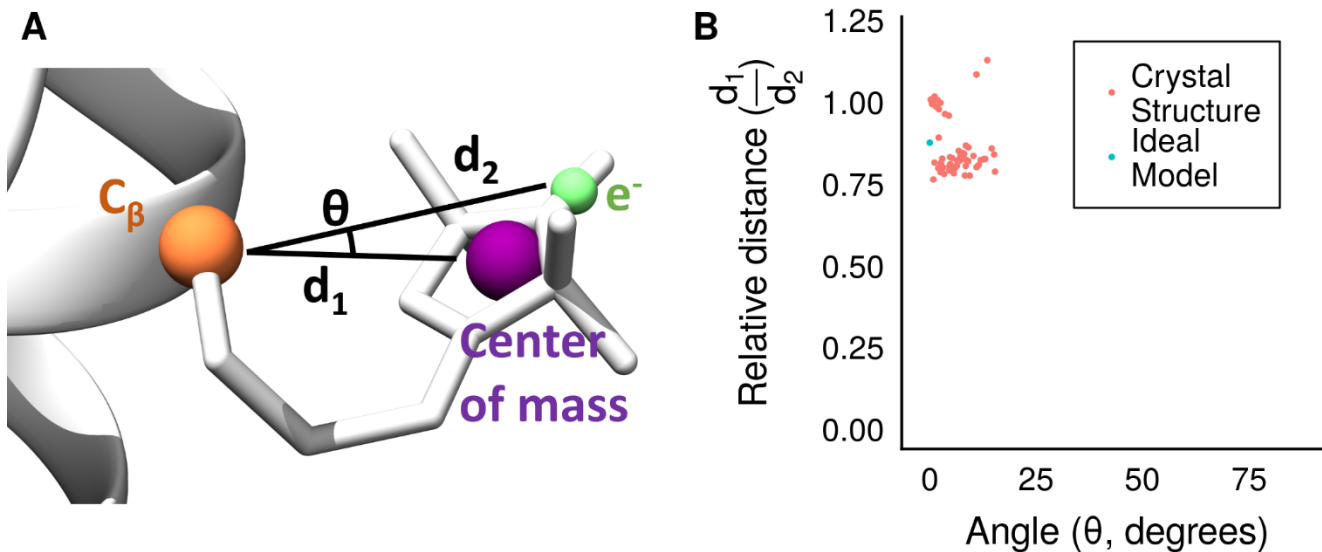

**Figure S2. Nitroxide centers of mass fall along the  $C_\beta$ -electron vector. A)** Depiction of spin label from PDB: 2Q9D showing the nitroxide center of mass (purple) and the nitroxide bond midpoint (green). **B).** Angle and relative distance of nitroxide center of mass along the  $C_\beta$ -electron vector.

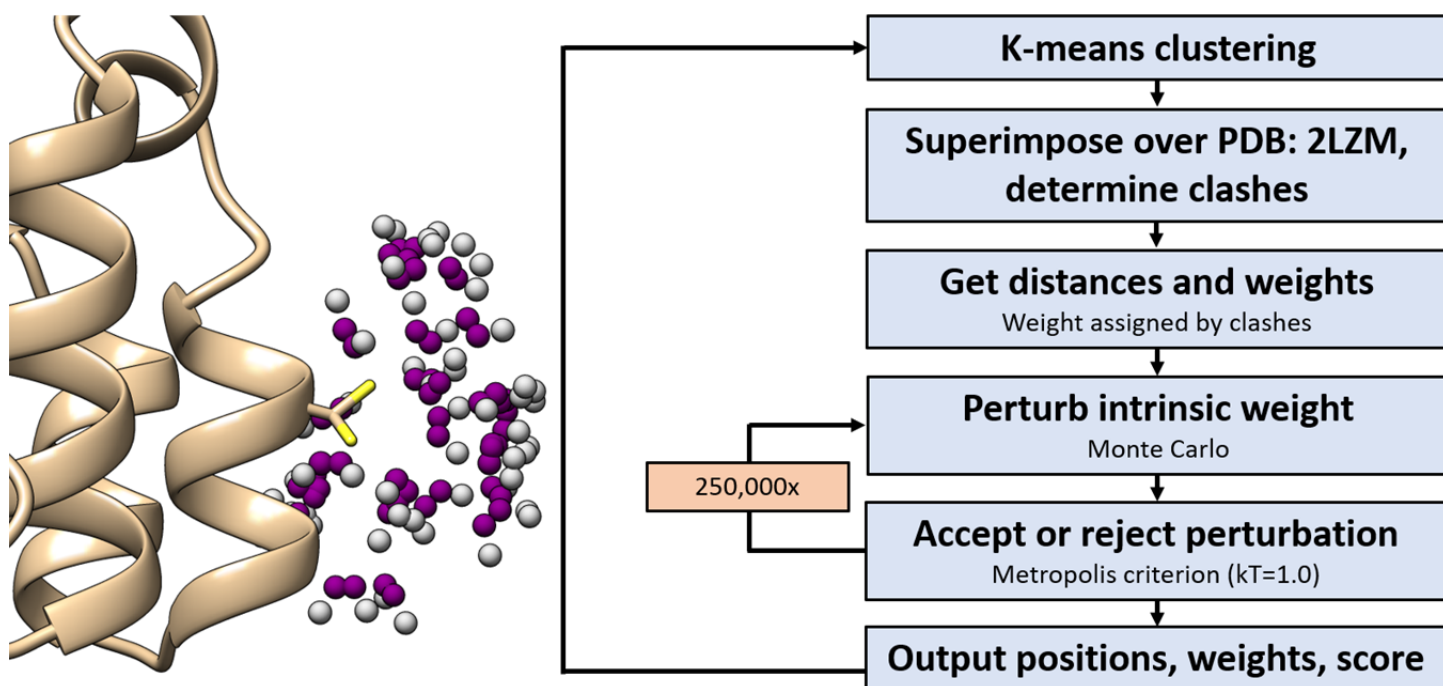

**Figure S3. Optimization of RosettaDEER measurement coordinates.** **Left:** Each of the rotamers in Rosetta’s MTSSL rotamer library was converted into two coordinates: one representing the nitroxide ring center of mass (purple), which was used to evaluate clashes; and one representing the nitroxide bond midpoint (silver), from which distances were measured. Shown over PDB 2CUU residue 131. **Right:** Optimization scheme for reducing the number of measurement coordinates using experimental T4 Lysozyme distance data. One thousand replicates were performed for each of  $N$  clusters, with  $N$  ranging from 3 to 53 coordinates.

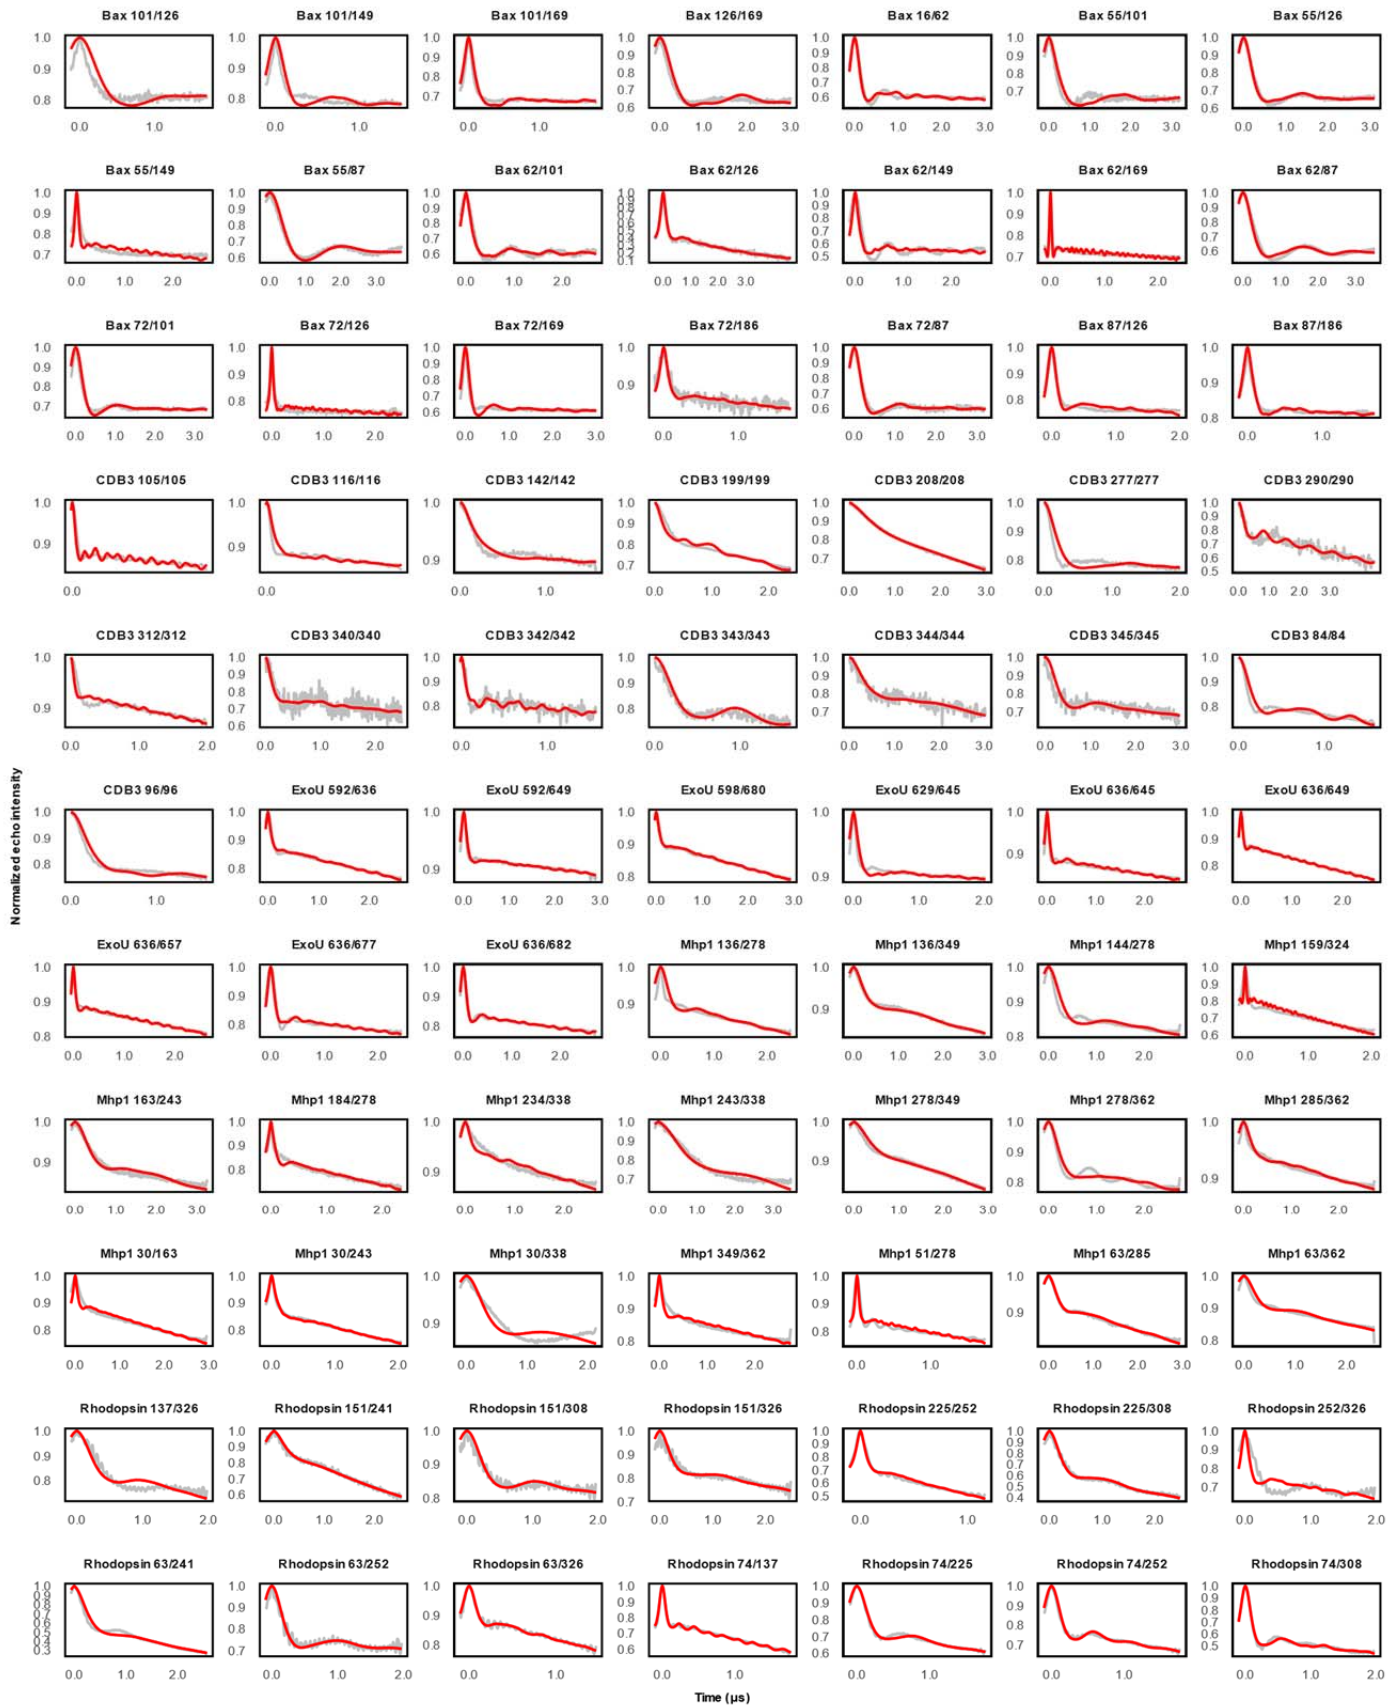

**Figure S4 (on previous page).** All simulated and experimental DEER decay data used in this study between experimentally resolved residues. RosettaDEER could generally, but not always, simulate DEER traces from native-like models that are comparable to the experimental data.

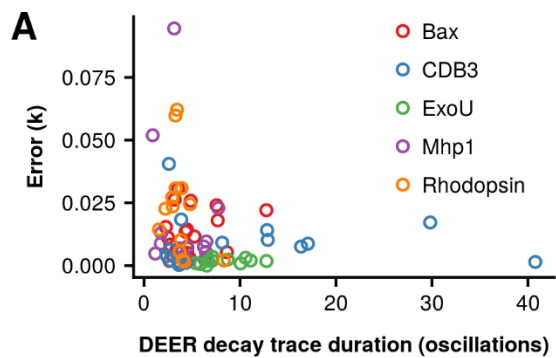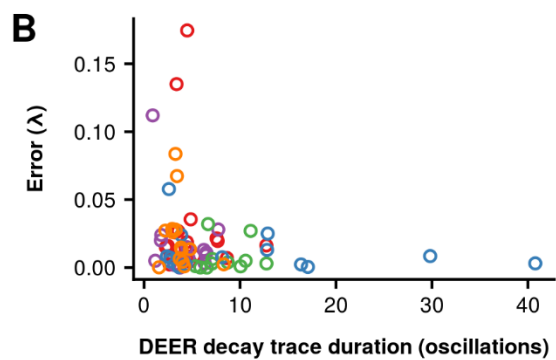

Figure S5. Deviation between experimental and simulated background decay ( $k$ ) and modulation depths ( $\lambda$ ).

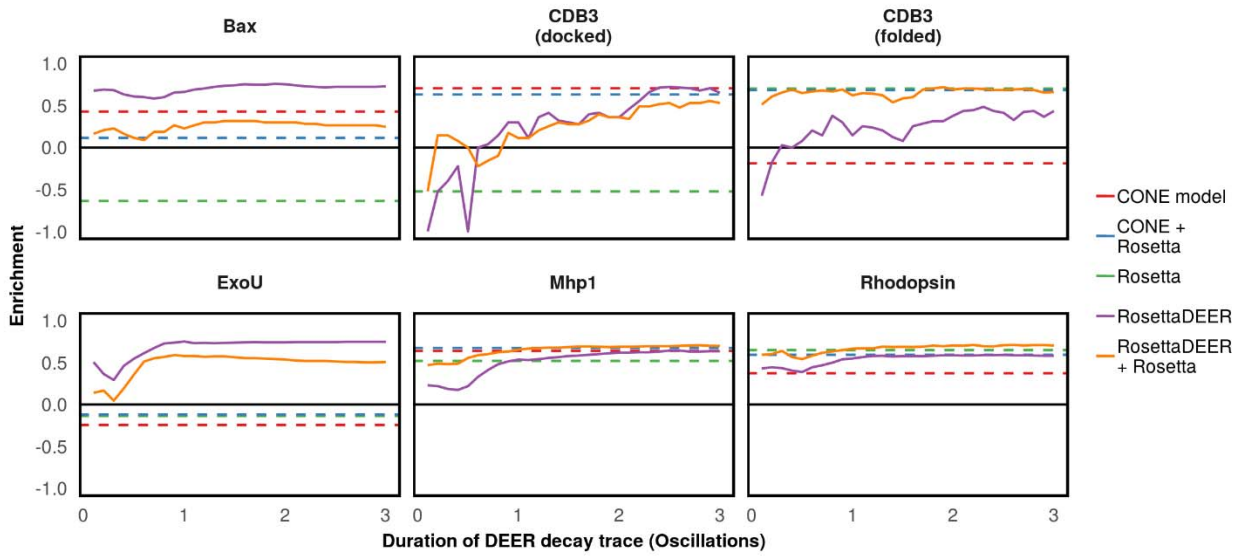

**Figure S6. Enrichment of misfolded and misdocked decoys as a function of DEER decay trace duration.** Enrichment was quantified as the logarithm of the percentage of native-like models (top 10% by RMSD100SSE) that were also in the top 10% by score. An enrichment of 1 indicates that the set of models constituting the top 10% by RosettaDEER score was identical to the set of models constituting the top 10% by Rosetta score.

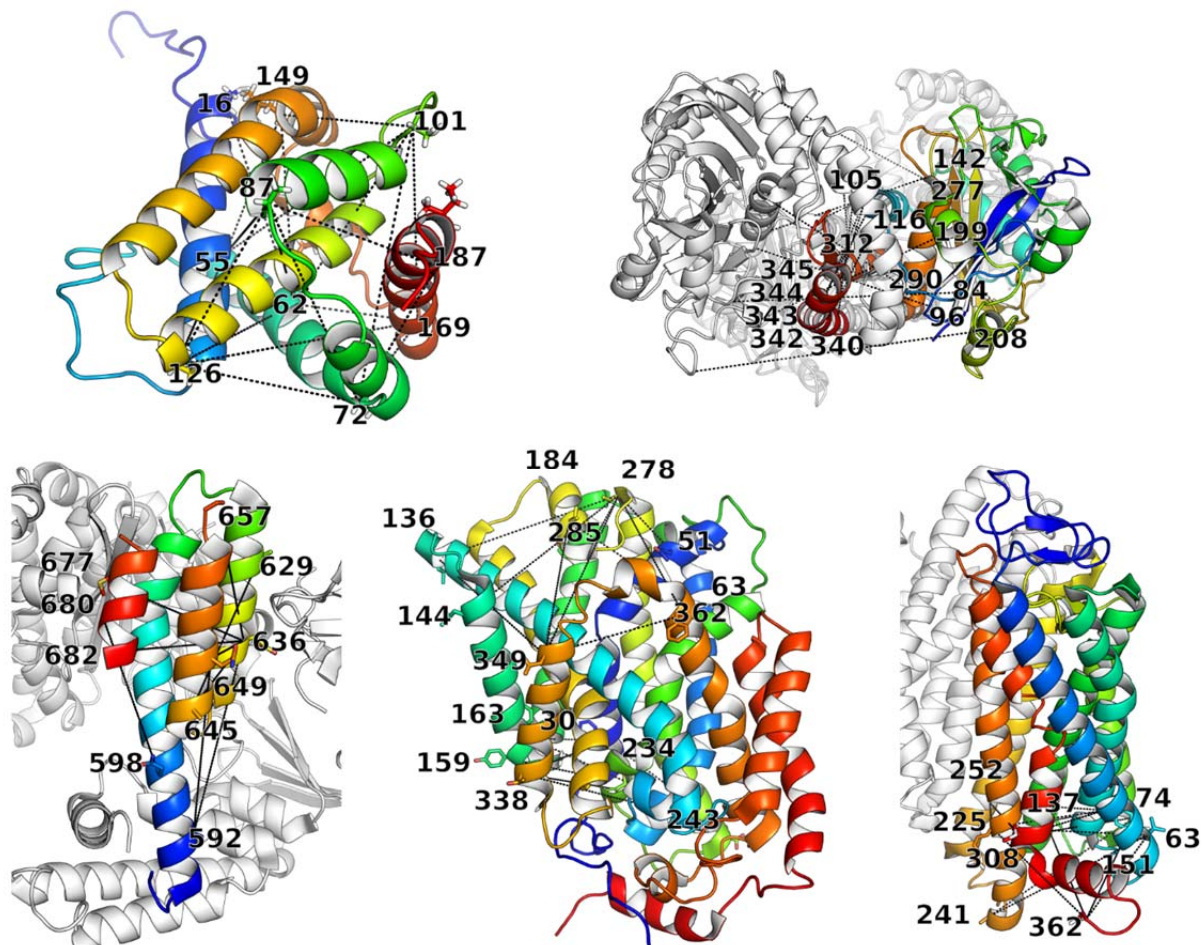

Figure S7. Placement of experimental DEER restraints on protein structures used in this study. Clockwise from top left: Bax (PDB: 1F16 model 8), CDB3 (PDB: 1HYN chains R/S), Rhodopsin (1GZM chain A), Mhp1 (PDB: 2JLN), and ExoU (PDB: 3TU3, C-terminus only).



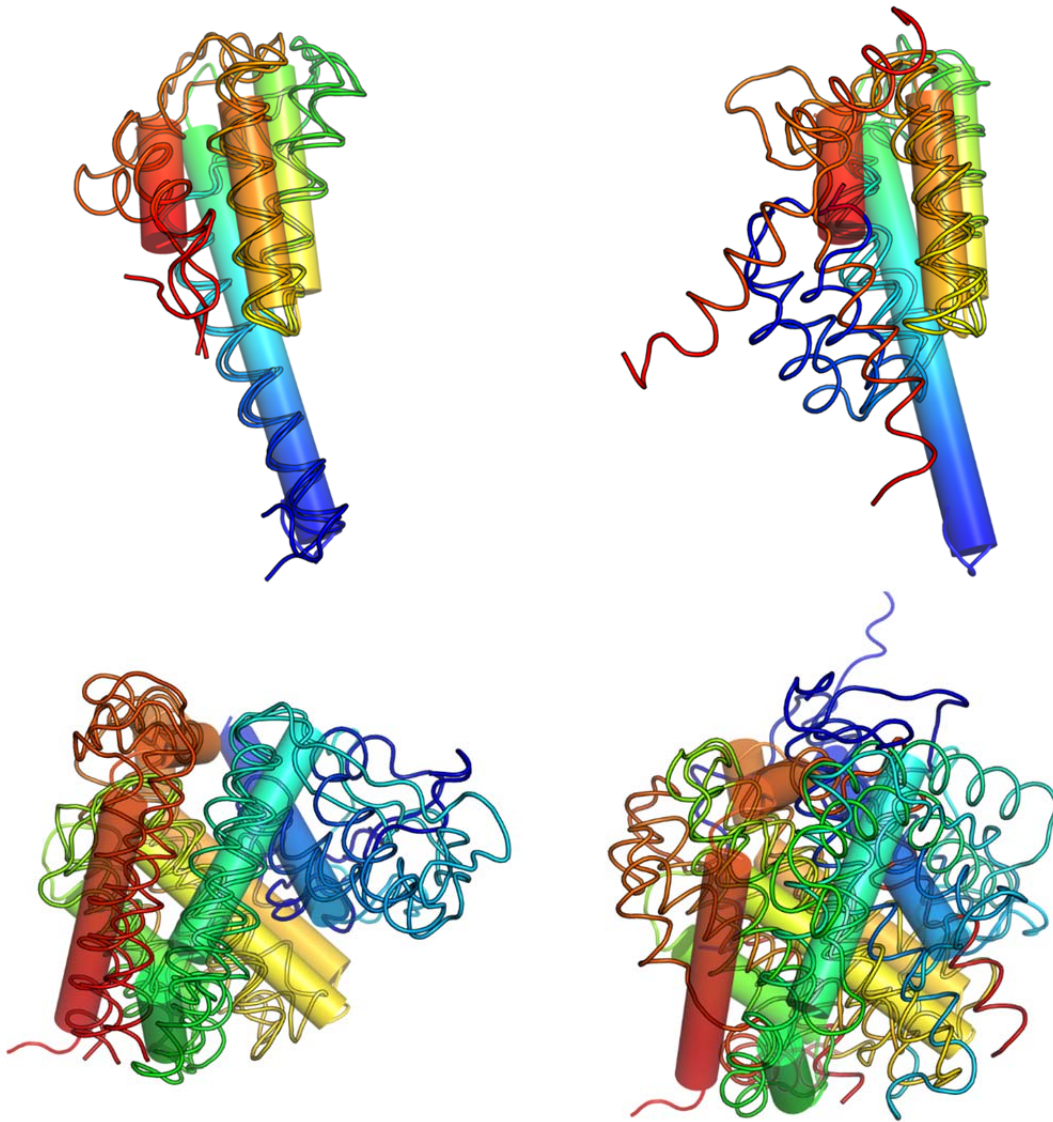

**Figure S8. Effect of DEER restraints on structure prediction of Bax and ExoU.** Top 3 best-scoring models of ExoU (top) and Bax (bottom) folded either with (left) or without (right) experimental DEER restraints. The native models are shown as cylinders for comparison.
